# Supplementary material for: Mendelian randomization informs shared genetic etiology underlying exposure and outcome by interrogating correlated horizontal pleiotropy
Source: Research Square preprint supplement (doi:10.21203/rs.3.rs-860357/v1), 2021-09-30
Supplement: Supplementary file 2 [file 86eec367cd677a42234eadd3.xlsx]

## Sheet: Table S4. Negative Control
Table S4. Genome wide association studies for Negative Control analysis.
	Tait Symbol	Trait	Sample Size	summary_statistics_link	PMID
Exposure	BMI	Body mass index	339224	http://portals.broadinstitute.org/collaboration/giant/images/1/15/SNP_gwas_mc_merge_nogc.tbl.uniq.gz	25673413
	T2D	Type 2 diabetes	69033	http://diagram-consortium.org/downloads.html	22885922
	HDL-C	High-density lipoprotein cholesterol	188577	http://csg.sph.umich.edu/abecasis/public/lipids2013/jointGwasMc_HDL.txt.gz	24097068
	LDL-C	Low-density lipoprotein cholesterol	188577	http://csg.sph.umich.edu/abecasis/public/lipids2013/jointGwasMc_LDL.txt.gz	24097068
	TC	Total cholesterol	188577	http://csg.sph.umich.edu/abecasis/public/lipids2013/jointGwasMc_TC.txt.gz	24097068
	TG	Triglycerides	188577	http://csg.sph.umich.edu/abecasis/public/lipids2013/jointGwasMc_TG.txt.gz	24097068
	CAD	Coronary artery disease	547261	ftp://ftp.ebi.ac.uk/pub/databases/gwas/summary_statistics/vanderHarstP_29212778_GCST005194/	29212778
	BMD	Total bone mineral density	66628	ftp://ftp.ebi.ac.uk/pub/databases/gwas/summary_statistics/Medina-GomezC_29304378_GCST005348	29304378
	BFP	Body fat percentage	100716	ftp://ftp.ebi.ac.uk/pub/databases/gwas/summary_statistics/LuY_26833246_GCST003435	26833246
	eGFR	egfr creatinine	133814	http://ckdgen.imbi.uni-freiburg.de/files/Pattaro2016/formatted_round3meta_eGFRcrea_overall_IV_2GC_b36_MAFget005_Nget50_20120705_b37.csv.gz	26831199
	AS	Any stroke	446696	https://www.megastroke.org/index.html	29531354
	AIS	Any ischemic stroke	446696	https://www.megastroke.org/index.html	29531354
	LAS	Large artery stroke	446696	https://www.megastroke.org/index.html	29531354
	CES	Cardioembolic stroke	446696	https://www.megastroke.org/index.html	29531354
	BIP	Bipolar disorder	45871	https://www.med.unc.edu/pgc/download-results/?wpv-category=bipolar-disorder	31926635
	ASD	Autism Spectrum Disorder	46350	https://www.med.unc.edu/pgc/download-results/?wpv-category=autism-spectrum-disorder	30804558
Outcome	Tanning	Self-reported tanning ability	463005	https://broad-ukb-sumstats-us-east-1.s3.amazonaws.com/round2/additive-tsvs/1727.gwas.imputed_v3.both_sexes.tsv.bgz
	BlaH	Black Hair	463005	https://broad-ukb-sumstats-us-east-1.s3.amazonaws.com/round2/additive-tsvs/1747_5.gwas.imputed_v3.both_sexes.tsv.bgz
	BloH	Blonde Hair	463005	https://broad-ukb-sumstats-us-east-1.s3.amazonaws.com/round2/additive-tsvs/1747_1.gwas.imputed_v3.both_sexes.tsv.bgz
	DBH	Dark Blonde Hair	463005	https://broad-ukb-sumstats-us-east-1.s3.amazonaws.com/round2/additive-tsvs/1747_4.gwas.imputed_v3.both_sexes.tsv.bgz
	LBH	Light Brown Hair	463005	https://broad-ukb-sumstats-us-east-1.s3.amazonaws.com/round2/additive-tsvs/1747_3.gwas.imputed_v3.both_sexes.tsv.bgz
	RH	Red Hair	463005	https://broad-ukb-sumstats-us-east-1.s3.amazonaws.com/round2/additive-tsvs/1747_2.gwas.imputed_v3.both_sexes.tsv.bgz

## Sheet: Table S5. Positive Control
Table S5. Genome wide association studies for Positive Control analysis.
Exposure					Outcome
Tait Symbol	Trait	Sample Size	summary_statistics_link	PMID	Tait Symbol	Trait	Sample Size	summary_statistics_link	PMID
HDL-C	High-density lipoprotein cholesterol	188577	http://csg.sph.umich.edu/abecasis/public/lipids2013/jointGwasMc_HDL.txt.gz	24097068	CAD1	Coronary artery disease	108039	http://cnsgenomics.com/data/GSMR/Zhu_et_al_GSMR_2017_GERA.tar.gz	29335400
HDL-C	High-density lipoprotein cholesterol	188577	http://csg.sph.umich.edu/abecasis/public/lipids2013/jointGwasMc_HDL.txt.gz	24097068	CAD2	Coronary artery disease	86995	http://www.cardiogramplusc4d.org/media/cardiogramplusc4d-consortium/data-downloads/cardiogram_gwas_results.zip	21378990
HDL-C	High-density lipoprotein cholesterol	188577	http://csg.sph.umich.edu/abecasis/public/lipids2013/jointGwasMc_HDL.txt.gz	24097068	T2D1	Type 2 diabetes	108039	http://cnsgenomics.com/data/GSMR/Zhu_et_al_GSMR_2017_GERA.tar.gz	29335400
HDL-C	High-density lipoprotein cholesterol	188577	http://csg.sph.umich.edu/abecasis/public/lipids2013/jointGwasMc_HDL.txt.gz	24097068	Dyslip	Dyslipidemia	108039	http://cnsgenomics.com/data/GSMR/Zhu_et_al_GSMR_2017_GERA.tar.gz	29335400
HDL-C	High-density lipoprotein cholesterol	188577	http://csg.sph.umich.edu/abecasis/public/lipids2013/jointGwasMc_HDL.txt.gz	24097068	Hyper	Hypertensive disease	108039	http://cnsgenomics.com/data/GSMR/Zhu_et_al_GSMR_2017_GERA.tar.gz	29335400
HDL-C	High-density lipoprotein cholesterol	188577	http://csg.sph.umich.edu/abecasis/public/lipids2013/jointGwasMc_HDL.txt.gz	24097068	DC	Disease count	108039	http://cnsgenomics.com/data/GSMR/Zhu_et_al_GSMR_2017_GERA.tar.gz	29335400
LDL-C	Low-density lipoprotein cholesterol	188577	http://csg.sph.umich.edu/abecasis/public/lipids2013/jointGwasMc_LDL.txt.gz	24097068	Dyslip	Dyslipidemia	108039	http://cnsgenomics.com/data/GSMR/Zhu_et_al_GSMR_2017_GERA.tar.gz	29335400
LDL-C	Low-density lipoprotein cholesterol	188577	http://csg.sph.umich.edu/abecasis/public/lipids2013/jointGwasMc_LDL.txt.gz	24097068	DC	Disease count	108039	http://cnsgenomics.com/data/GSMR/Zhu_et_al_GSMR_2017_GERA.tar.gz	29335400
LDL-C	Low-density lipoprotein cholesterol	188577	http://csg.sph.umich.edu/abecasis/public/lipids2013/jointGwasMc_LDL.txt.gz	24097068	AS	Any stroke	446696	https://www.megastroke.org/index.html	29531354
LDL-C	Low-density lipoprotein cholesterol	188577	http://csg.sph.umich.edu/abecasis/public/lipids2013/jointGwasMc_LDL.txt.gz	24097068	AIS	Any ischemic stroke	446696	https://www.megastroke.org/index.html	29531354
LDL-C	Low-density lipoprotein cholesterol	188577	http://csg.sph.umich.edu/abecasis/public/lipids2013/jointGwasMc_LDL.txt.gz	24097068	LAS	Large artery stroke	446696	https://www.megastroke.org/index.html	29531354
LDL-C	Low-density lipoprotein cholesterol	188577	http://csg.sph.umich.edu/abecasis/public/lipids2013/jointGwasMc_LDL.txt.gz	24097068	CES	Cardioembolic stroke	446696	https://www.megastroke.org/index.html	29531354
LDL-C	Low-density lipoprotein cholesterol	188577	http://csg.sph.umich.edu/abecasis/public/lipids2013/jointGwasMc_LDL.txt.gz	24097068	SVS	Small vessel stroke	446696	https://www.megastroke.org/index.html	29531354
LDL-C	Low-density lipoprotein cholesterol	188577	http://csg.sph.umich.edu/abecasis/public/lipids2013/jointGwasMc_LDL.txt.gz	24097068	CAD1	Coronary artery disease	108039	http://cnsgenomics.com/data/GSMR/Zhu_et_al_GSMR_2017_GERA.tar.gz	29335400
LDL-C	Low-density lipoprotein cholesterol	188577	http://csg.sph.umich.edu/abecasis/public/lipids2013/jointGwasMc_LDL.txt.gz	24097068	CAD2	Coronary artery disease	86995	http://www.cardiogramplusc4d.org/media/cardiogramplusc4d-consortium/data-downloads/cardiogram_gwas_results.zip	21378990
TG	Triglycerides	188577	http://csg.sph.umich.edu/abecasis/public/lipids2013/jointGwasMc_TG.txt.gz	24097068	CAD1	Coronary artery disease	108039	http://cnsgenomics.com/data/GSMR/Zhu_et_al_GSMR_2017_GERA.tar.gz	29335400
TG	Triglycerides	188577	http://csg.sph.umich.edu/abecasis/public/lipids2013/jointGwasMc_TG.txt.gz	24097068	Dyslip	Dyslipidemia	108039	http://cnsgenomics.com/data/GSMR/Zhu_et_al_GSMR_2017_GERA.tar.gz	29335400
TG	Triglycerides	188577	http://csg.sph.umich.edu/abecasis/public/lipids2013/jointGwasMc_TG.txt.gz	24097068	Hyper	Hypertensive disease	108039	http://cnsgenomics.com/data/GSMR/Zhu_et_al_GSMR_2017_GERA.tar.gz	29335400
TG	Triglycerides	188577	http://csg.sph.umich.edu/abecasis/public/lipids2013/jointGwasMc_TG.txt.gz	24097068	DC	Disease count	108039	http://cnsgenomics.com/data/GSMR/Zhu_et_al_GSMR_2017_GERA.tar.gz	29335400
TG	Triglycerides	188577	http://csg.sph.umich.edu/abecasis/public/lipids2013/jointGwasMc_TG.txt.gz	24097068	CAD2	Coronary artery disease	86995	http://www.cardiogramplusc4d.org/media/cardiogramplusc4d-consortium/data-downloads/cardiogram_gwas_results.zip	21378990
SBP	Systolic blood pressure	757601	https://grasp.nhlbi.nih.gov/downloads/ResultsAug2019/2018/Evangelou/UKB-ICBPmeta750k_SBPsummaryResults.txt.gz	30224653	CAD1	Coronary artery disease	108039	http://cnsgenomics.com/data/GSMR/Zhu_et_al_GSMR_2017_GERA.tar.gz	29335400
SBP	Systolic blood pressure	757601	https://grasp.nhlbi.nih.gov/downloads/ResultsAug2019/2018/Evangelou/UKB-ICBPmeta750k_SBPsummaryResults.txt.gz	30224653	CAD2	Coronary artery disease	86995	http://www.cardiogramplusc4d.org/media/cardiogramplusc4d-consortium/data-downloads/cardiogram_gwas_results.zip	21378990
SBP	Systolic blood pressure	757601	https://grasp.nhlbi.nih.gov/downloads/ResultsAug2019/2018/Evangelou/UKB-ICBPmeta750k_SBPsummaryResults.txt.gz	30224653	Dyslip	Dyslipidemia	108039	http://cnsgenomics.com/data/GSMR/Zhu_et_al_GSMR_2017_GERA.tar.gz	29335400
SBP	Systolic blood pressure	757601	https://grasp.nhlbi.nih.gov/downloads/ResultsAug2019/2018/Evangelou/UKB-ICBPmeta750k_SBPsummaryResults.txt.gz	30224653	Hyper	Hypertensive disease	108039	http://cnsgenomics.com/data/GSMR/Zhu_et_al_GSMR_2017_GERA.tar.gz	29335400
SBP	Systolic blood pressure	757601	https://grasp.nhlbi.nih.gov/downloads/ResultsAug2019/2018/Evangelou/UKB-ICBPmeta750k_SBPsummaryResults.txt.gz	30224653	DC	Disease count	108039	http://cnsgenomics.com/data/GSMR/Zhu_et_al_GSMR_2017_GERA.tar.gz	29335400
SBP	Systolic blood pressure	757601	https://grasp.nhlbi.nih.gov/downloads/ResultsAug2019/2018/Evangelou/UKB-ICBPmeta750k_SBPsummaryResults.txt.gz	30224653	AS	Any stroke	446696	https://www.megastroke.org/index.html	29531354
SBP	Systolic blood pressure	757601	https://grasp.nhlbi.nih.gov/downloads/ResultsAug2019/2018/Evangelou/UKB-ICBPmeta750k_SBPsummaryResults.txt.gz	30224653	AIS	Any ischemic stroke	446696	https://www.megastroke.org/index.html	29531354
SBP	Systolic blood pressure	757601	https://grasp.nhlbi.nih.gov/downloads/ResultsAug2019/2018/Evangelou/UKB-ICBPmeta750k_SBPsummaryResults.txt.gz	30224653	LAS	Large artery stroke	446696	https://www.megastroke.org/index.html	29531354
SBP	Systolic blood pressure	757601	https://grasp.nhlbi.nih.gov/downloads/ResultsAug2019/2018/Evangelou/UKB-ICBPmeta750k_SBPsummaryResults.txt.gz	30224653	CES	Cardioembolic stroke	446696	https://www.megastroke.org/index.html	29531354
SBP	Systolic blood pressure	757601	https://grasp.nhlbi.nih.gov/downloads/ResultsAug2019/2018/Evangelou/UKB-ICBPmeta750k_SBPsummaryResults.txt.gz	30224653	AF	Atrial Fibrillation	1030836	http://csg.sph.umich.edu/willer/public/afib2018/	30061737
SBP	Systolic blood pressure	757601	https://grasp.nhlbi.nih.gov/downloads/ResultsAug2019/2018/Evangelou/UKB-ICBPmeta750k_SBPsummaryResults.txt.gz	30224653	SVS	Small vessel stroke	446696	https://www.megastroke.org/index.html	29531354
DBP	Diastolic blood pressure	757601	https://grasp.nhlbi.nih.gov/downloads/ResultsAug2019/2018/Evangelou/UKB-ICBPmeta750k_DBPsummaryResults.txt.gz	30224653	CAD1	Coronary artery disease	108039	http://cnsgenomics.com/data/GSMR/Zhu_et_al_GSMR_2017_GERA.tar.gz	29335400
DBP	Diastolic blood pressure	757601	https://grasp.nhlbi.nih.gov/downloads/ResultsAug2019/2018/Evangelou/UKB-ICBPmeta750k_DBPsummaryResults.txt.gz	30224653	CAD2	Coronary artery disease	86995	http://www.cardiogramplusc4d.org/media/cardiogramplusc4d-consortium/data-downloads/cardiogram_gwas_results.zip	21378990
DBP	Diastolic blood pressure	757601	https://grasp.nhlbi.nih.gov/downloads/ResultsAug2019/2018/Evangelou/UKB-ICBPmeta750k_DBPsummaryResults.txt.gz	30224653	Dyslip	Dyslipidemia	108039	http://cnsgenomics.com/data/GSMR/Zhu_et_al_GSMR_2017_GERA.tar.gz	29335400
DBP	Diastolic blood pressure	757601	https://grasp.nhlbi.nih.gov/downloads/ResultsAug2019/2018/Evangelou/UKB-ICBPmeta750k_DBPsummaryResults.txt.gz	30224653	Hyper	Hypertensive disease	108039	http://cnsgenomics.com/data/GSMR/Zhu_et_al_GSMR_2017_GERA.tar.gz	29335400
DBP	Diastolic blood pressure	757601	https://grasp.nhlbi.nih.gov/downloads/ResultsAug2019/2018/Evangelou/UKB-ICBPmeta750k_DBPsummaryResults.txt.gz	30224653	DC	Disease count	108039	http://cnsgenomics.com/data/GSMR/Zhu_et_al_GSMR_2017_GERA.tar.gz	29335400
DBP	Diastolic blood pressure	757601	https://grasp.nhlbi.nih.gov/downloads/ResultsAug2019/2018/Evangelou/UKB-ICBPmeta750k_DBPsummaryResults.txt.gz	30224653	AS	Any stroke	446696	https://www.megastroke.org/index.html	29531354
DBP	Diastolic blood pressure	757601	https://grasp.nhlbi.nih.gov/downloads/ResultsAug2019/2018/Evangelou/UKB-ICBPmeta750k_DBPsummaryResults.txt.gz	30224653	AIS	Any ischemic stroke	446696	https://www.megastroke.org/index.html	29531354
DBP	Diastolic blood pressure	757601	https://grasp.nhlbi.nih.gov/downloads/ResultsAug2019/2018/Evangelou/UKB-ICBPmeta750k_DBPsummaryResults.txt.gz	30224653	LAS	Large artery stroke	446696	https://www.megastroke.org/index.html	29531354
DBP	Diastolic blood pressure	757601	https://grasp.nhlbi.nih.gov/downloads/ResultsAug2019/2018/Evangelou/UKB-ICBPmeta750k_DBPsummaryResults.txt.gz	30224653	CES	Cardioembolic stroke	446696	https://www.megastroke.org/index.html	29531354
DBP	Diastolic blood pressure	757601	https://grasp.nhlbi.nih.gov/downloads/ResultsAug2019/2018/Evangelou/UKB-ICBPmeta750k_DBPsummaryResults.txt.gz	30224653	SVS	Small vessel stroke	446696	https://www.megastroke.org/index.html	29531354
DBP	Diastolic blood pressure	757601	https://grasp.nhlbi.nih.gov/downloads/ResultsAug2019/2018/Evangelou/UKB-ICBPmeta750k_DBPsummaryResults.txt.gz	30224653	AF	Atrial Fibrillation	1030836	http://csg.sph.umich.edu/willer/public/afib2018/	30061737
PP	Pulse pressure	757601	https://grasp.nhlbi.nih.gov/downloads/ResultsAug2019/2018/Evangelou/UKB-ICBPmeta750k_PPsummaryResults.txt.gz	30224653	AF	Atrial Fibrillation	1030836	http://csg.sph.umich.edu/willer/public/afib2018/	30061737
EduYears	Years of schooling	293723	https://grasp.nhlbi.nih.gov/downloads/ResultsFebruary2017/2016/2016_Okbay_a/EduYears_Main.txt.gz	27225129	CAD1	Coronary artery disease	108039	http://cnsgenomics.com/data/GSMR/Zhu_et_al_GSMR_2017_GERA.tar.gz	29335400
EduYears	Years of schooling	293723	https://grasp.nhlbi.nih.gov/downloads/ResultsFebruary2017/2016/2016_Okbay_a/EduYears_Main.txt.gz	27225129	CAD2	Coronary artery disease	86995	http://www.cardiogramplusc4d.org/media/cardiogramplusc4d-consortium/data-downloads/cardiogram_gwas_results.zip	21378990
EduYears	Years of schooling	293723	https://grasp.nhlbi.nih.gov/downloads/ResultsFebruary2017/2016/2016_Okbay_a/EduYears_Main.txt.gz	27225129	T2D1	Type 2 diabetes	108039	http://cnsgenomics.com/data/GSMR/Zhu_et_al_GSMR_2017_GERA.tar.gz	29335400
EduYears	Years of schooling	293723	https://grasp.nhlbi.nih.gov/downloads/ResultsFebruary2017/2016/2016_Okbay_a/EduYears_Main.txt.gz	27225129	Dyslip	Dyslipidemia	108039	http://cnsgenomics.com/data/GSMR/Zhu_et_al_GSMR_2017_GERA.tar.gz	29335400
EduYears	Years of schooling	293723	https://grasp.nhlbi.nih.gov/downloads/ResultsFebruary2017/2016/2016_Okbay_a/EduYears_Main.txt.gz	27225129	Hyper	Hypertensive disease	108039	http://cnsgenomics.com/data/GSMR/Zhu_et_al_GSMR_2017_GERA.tar.gz	29335400
EduYears	Years of schooling	293723	https://grasp.nhlbi.nih.gov/downloads/ResultsFebruary2017/2016/2016_Okbay_a/EduYears_Main.txt.gz	27225129	DC	Disease count	108039	http://cnsgenomics.com/data/GSMR/Zhu_et_al_GSMR_2017_GERA.tar.gz	29335400
Nsmoke	Never Smoking	499702	https://biobank.ctsu.ox.ac.uk/crystal/field.cgi?id=20160		T2D1	Type 2 diabetes	108039	http://cnsgenomics.com/data/GSMR/Zhu_et_al_GSMR_2017_GERA.tar.gz	29335400
Nsmoke	Never Smoking	499702	https://biobank.ctsu.ox.ac.uk/crystal/field.cgi?id=20160		CAD1	Coronary artery disease	108039	http://cnsgenomics.com/data/GSMR/Zhu_et_al_GSMR_2017_GERA.tar.gz	29335400
Nsmoke	Never Smoking	499702	https://biobank.ctsu.ox.ac.uk/crystal/field.cgi?id=20160		CAD2	Coronary artery disease	86995	http://www.cardiogramplusc4d.org/media/cardiogramplusc4d-consortium/data-downloads/cardiogram_gwas_results.zip	21378990
Nsmoke	Never Smoking	499702	https://biobank.ctsu.ox.ac.uk/crystal/field.cgi?id=20160		Asthma	Asthma	108039	http://cnsgenomics.com/data/GSMR/Zhu_et_al_GSMR_2017_GERA.tar.gz	29335400
Nsmoke	Never Smoking	499702	https://biobank.ctsu.ox.ac.uk/crystal/field.cgi?id=20160		AS	Any stroke	446696	https://www.megastroke.org/index.html	29531354
Nsmoke	Never Smoking	499702	https://biobank.ctsu.ox.ac.uk/crystal/field.cgi?id=20160		AIS	Any ischemic stroke	446696	https://www.megastroke.org/index.html	29531354
Nsmoke	Never Smoking	499702	https://biobank.ctsu.ox.ac.uk/crystal/field.cgi?id=20160		LAS	Large artery stroke	446696	https://www.megastroke.org/index.html	29531354
Nsmoke	Never Smoking	499702	https://biobank.ctsu.ox.ac.uk/crystal/field.cgi?id=20160		CES	Cardioembolic stroke	446696	https://www.megastroke.org/index.html	29531354
Nsmoke	Never Smoking	499702	https://biobank.ctsu.ox.ac.uk/crystal/field.cgi?id=20160		SVS	Small vessel stroke	446696	https://www.megastroke.org/index.html	29531354
Smoke	Smoking	341427	https://conservancy.umn.edu/bitstream/handle/11299/201564/SmokingInitiation.WithoutUKB.txt.gz?sequence=42&isAllowed=y	30643251	T2D1	Type 2 diabetes	108039	http://cnsgenomics.com/data/GSMR/Zhu_et_al_GSMR_2017_GERA.tar.gz	29335400
Smoke	Smoking	341427	https://conservancy.umn.edu/bitstream/handle/11299/201564/SmokingInitiation.WithoutUKB.txt.gz?sequence=42&isAllowed=y	30643251	CAD1	Coronary artery disease	108039	http://cnsgenomics.com/data/GSMR/Zhu_et_al_GSMR_2017_GERA.tar.gz	29335400
Smoke	Smoking	341427	https://conservancy.umn.edu/bitstream/handle/11299/201564/SmokingInitiation.WithoutUKB.txt.gz?sequence=42&isAllowed=y	30643251	CAD2	Coronary artery disease	86995	http://www.cardiogramplusc4d.org/media/cardiogramplusc4d-consortium/data-downloads/cardiogram_gwas_results.zip	21378990
Smoke	Smoking	341427	https://conservancy.umn.edu/bitstream/handle/11299/201564/SmokingInitiation.WithoutUKB.txt.gz?sequence=42&isAllowed=y	30643251	Asthma	Asthma	108039	http://cnsgenomics.com/data/GSMR/Zhu_et_al_GSMR_2017_GERA.tar.gz	29335400
Smoke	Smoking	341427	https://conservancy.umn.edu/bitstream/handle/11299/201564/SmokingInitiation.WithoutUKB.txt.gz?sequence=42&isAllowed=y	30643251	AS	Any stroke	446696	https://www.megastroke.org/index.html	29531354
Smoke	Smoking	341427	https://conservancy.umn.edu/bitstream/handle/11299/201564/SmokingInitiation.WithoutUKB.txt.gz?sequence=42&isAllowed=y	30643251	AIS	Any ischemic stroke	446696	https://www.megastroke.org/index.html	29531354
Smoke	Smoking	341427	https://conservancy.umn.edu/bitstream/handle/11299/201564/SmokingInitiation.WithoutUKB.txt.gz?sequence=42&isAllowed=y	30643251	LAS	Large artery stroke	446696	https://www.megastroke.org/index.html	29531354
Smoke	Smoking	341427	https://conservancy.umn.edu/bitstream/handle/11299/201564/SmokingInitiation.WithoutUKB.txt.gz?sequence=42&isAllowed=y	30643251	CES	Cardioembolic stroke	446696	https://www.megastroke.org/index.html	29531354
Smoke	Smoking	341427	https://conservancy.umn.edu/bitstream/handle/11299/201564/SmokingInitiation.WithoutUKB.txt.gz?sequence=42&isAllowed=y	30643251	SVS	Small vessel stroke	446696	https://www.megastroke.org/index.html	29531354
Intel (CGT)	Intelligence (CGT)	78308	https://ctg.cncr.nl/documents/p1651/sumstats.txt.gz	28530673	Income (UKB)	Income (UKB)	286301	https://datashare.ed.ac.uk/bitstream/handle/10283/3441/Household_Income_UKBiobank.txt.gz?sequence=6&isAllowed=y	31844048
Intel (CGT)	Intelligence (CGT)	78308	https://ctg.cncr.nl/documents/p1651/sumstats.txt.gz	28530673	Income (MTAG)	Income (MTAG)	505541	https://datashare.ed.ac.uk/bitstream/handle/10283/3441/MTAG_household_Income.txt.gz?sequence=5&isAllowed=y	31844048
Intel (UKB)	Intelligence (UKB)	205331	https://biobank.ctsu.ox.ac.uk/crystal/field.cgi?id=20016		Income (UKB)	Income (UKB)	286301	https://datashare.ed.ac.uk/bitstream/handle/10283/3441/Household_Income_UKBiobank.txt.gz?sequence=6&isAllowed=y	31844048
Intel (UKB)	Intelligence (UKB)	205331	https://biobank.ctsu.ox.ac.uk/crystal/field.cgi?id=20016		Income (MTAG)	Income (MTAG)	505541	https://datashare.ed.ac.uk/bitstream/handle/10283/3441/MTAG_household_Income.txt.gz?sequence=5&isAllowed=y	31844048
Sleep	Sleep duration	91105	https://ora.ox.ac.uk/objects/uuid:ff479f44-bf35-48b9-9e67-e690a2937b22/download_file?file_format=gzip&safe_filename=Doherty-2018-NatureComms-sleep-duration.csv.gz&type_of_work=Dataset		SCZ	schizophrenia	77096	https://www.med.unc.edu/pgc/download-results/scz/	25056061
BMI	Body mass index	339224	http://portals.broadinstitute.org/collaboration/giant/images/1/15/SNP_gwas_mc_merge_nogc.tbl.uniq.gz	25673413	SBP	Systolic blood pressure	757601	https://grasp.nhlbi.nih.gov/downloads/ResultsAug2019/2018/Evangelou/UKB-ICBPmeta750k_SBPsummaryResults.txt.gz	30224653
BMI	Body mass index	339224	http://portals.broadinstitute.org/collaboration/giant/images/1/15/SNP_gwas_mc_merge_nogc.tbl.uniq.gz	25673413	CAD1	Coronary artery disease	108039	http://cnsgenomics.com/data/GSMR/Zhu_et_al_GSMR_2017_GERA.tar.gz	29335400
BMI	Body mass index	339224	http://portals.broadinstitute.org/collaboration/giant/images/1/15/SNP_gwas_mc_merge_nogc.tbl.uniq.gz	25673413	CAD2	Coronary artery disease	86995	http://www.cardiogramplusc4d.org/media/cardiogramplusc4d-consortium/data-downloads/cardiogram_gwas_results.zip	21378990
BMI	Body mass index	339224	http://portals.broadinstitute.org/collaboration/giant/images/1/15/SNP_gwas_mc_merge_nogc.tbl.uniq.gz	25673413	AS	Any stroke	446696	https://www.megastroke.org/index.html	29531354
BMI	Body mass index	339224	http://portals.broadinstitute.org/collaboration/giant/images/1/15/SNP_gwas_mc_merge_nogc.tbl.uniq.gz	25673413	AIS	Any ischemic stroke	446696	https://www.megastroke.org/index.html	29531354
BMI	Body mass index	339224	http://portals.broadinstitute.org/collaboration/giant/images/1/15/SNP_gwas_mc_merge_nogc.tbl.uniq.gz	25673413	LAS	Large artery stroke	446696	https://www.megastroke.org/index.html	29531354
BMI	Body mass index	339224	http://portals.broadinstitute.org/collaboration/giant/images/1/15/SNP_gwas_mc_merge_nogc.tbl.uniq.gz	25673413	CES	Cardioembolic stroke	446696	https://www.megastroke.org/index.html	29531354
BMI	Body mass index	339224	http://portals.broadinstitute.org/collaboration/giant/images/1/15/SNP_gwas_mc_merge_nogc.tbl.uniq.gz	25673413	SVS	Small vessel stroke	446696	https://www.megastroke.org/index.html	29531354
BMI	Body mass index	339224	http://portals.broadinstitute.org/collaboration/giant/images/1/15/SNP_gwas_mc_merge_nogc.tbl.uniq.gz	25673413	Asthma	Asthma	108039	http://cnsgenomics.com/data/GSMR/Zhu_et_al_GSMR_2017_GERA.tar.gz	29335400
BMI	Body mass index	339224	http://portals.broadinstitute.org/collaboration/giant/images/1/15/SNP_gwas_mc_merge_nogc.tbl.uniq.gz	25673413	T2D1	Type 2 diabetes	108039	http://cnsgenomics.com/data/GSMR/Zhu_et_al_GSMR_2017_GERA.tar.gz	29335400
BMI	Body mass index	339224	http://portals.broadinstitute.org/collaboration/giant/images/1/15/SNP_gwas_mc_merge_nogc.tbl.uniq.gz	25673413	Dyslip	Dyslipidemia	108039	http://cnsgenomics.com/data/GSMR/Zhu_et_al_GSMR_2017_GERA.tar.gz	29335400
BMI	Body mass index	339224	http://portals.broadinstitute.org/collaboration/giant/images/1/15/SNP_gwas_mc_merge_nogc.tbl.uniq.gz	25673413	Hyper	Hypertensive disease	108039	http://cnsgenomics.com/data/GSMR/Zhu_et_al_GSMR_2017_GERA.tar.gz	29335400
BMI	Body mass index	339224	http://portals.broadinstitute.org/collaboration/giant/images/1/15/SNP_gwas_mc_merge_nogc.tbl.uniq.gz	25673413	T2D2	Type 2 diabetes	69033	http://diagram-consortium.org/downloads.html	22885922
BMI	Body mass index	339224	http://portals.broadinstitute.org/collaboration/giant/images/1/15/SNP_gwas_mc_merge_nogc.tbl.uniq.gz	25673413	DC	Disease count	108039	http://cnsgenomics.com/data/GSMR/Zhu_et_al_GSMR_2017_GERA.tar.gz	29335400
Height	Height	253288	http://portals.broadinstitute.org/collaboration/giant/images/0/01/GIANT_HEIGHT_Wood_et_al_2014_publicrelease_HapMapCeuFreq.txt.gz	25282103	Asthma	Asthma	108039	http://cnsgenomics.com/data/GSMR/Zhu_et_al_GSMR_2017_GERA.tar.gz	29335400
Height	Height	253288	http://portals.broadinstitute.org/collaboration/giant/images/0/01/GIANT_HEIGHT_Wood_et_al_2014_publicrelease_HapMapCeuFreq.txt.gz	25282103	CAD2	Coronary artery disease	86995	http://www.cardiogramplusc4d.org/media/cardiogramplusc4d-consortium/data-downloads/cardiogram_gwas_results.zip	21378990
Height	Height	253288	http://portals.broadinstitute.org/collaboration/giant/images/0/01/GIANT_HEIGHT_Wood_et_al_2014_publicrelease_HapMapCeuFreq.txt.gz	25282103	CAD1	Coronary artery disease	108039	http://cnsgenomics.com/data/GSMR/Zhu_et_al_GSMR_2017_GERA.tar.gz	29335400
Height	Height	253288	http://portals.broadinstitute.org/collaboration/giant/images/0/01/GIANT_HEIGHT_Wood_et_al_2014_publicrelease_HapMapCeuFreq.txt.gz	25282103	T2D1	Type 2 diabetes	108039	http://cnsgenomics.com/data/GSMR/Zhu_et_al_GSMR_2017_GERA.tar.gz	29335400
Height	Height	253288	http://portals.broadinstitute.org/collaboration/giant/images/0/01/GIANT_HEIGHT_Wood_et_al_2014_publicrelease_HapMapCeuFreq.txt.gz	25282103	Dyslip	Dyslipidemia	108039	http://cnsgenomics.com/data/GSMR/Zhu_et_al_GSMR_2017_GERA.tar.gz	29335400
Height	Height	253288	http://portals.broadinstitute.org/collaboration/giant/images/0/01/GIANT_HEIGHT_Wood_et_al_2014_publicrelease_HapMapCeuFreq.txt.gz	25282103	Hyper	Hypertensive disease	108039	http://cnsgenomics.com/data/GSMR/Zhu_et_al_GSMR_2017_GERA.tar.gz	29335400
Height	Height	253288	http://portals.broadinstitute.org/collaboration/giant/images/0/01/GIANT_HEIGHT_Wood_et_al_2014_publicrelease_HapMapCeuFreq.txt.gz	25282103	Osteo	Osteoarthritis	108039	http://cnsgenomics.com/data/GSMR/Zhu_et_al_GSMR_2017_GERA.tar.gz	29335400
BFP	Body fat percentage	100716	ftp://ftp.ebi.ac.uk/pub/databases/gwas/summary_statistics/LuY_26833246_GCST003435	26833246	SBP	Systolic blood pressure	757601	https://grasp.nhlbi.nih.gov/downloads/ResultsAug2019/2018/Evangelou/UKB-ICBPmeta750k_SBPsummaryResults.txt.gz	25673413
BFP	Body fat percentage	100716	ftp://ftp.ebi.ac.uk/pub/databases/gwas/summary_statistics/LuY_26833246_GCST003435	26833246	AS	Any stroke	446696	https://www.megastroke.org/index.html	29531354
BFP	Body fat percentage	100716	ftp://ftp.ebi.ac.uk/pub/databases/gwas/summary_statistics/LuY_26833246_GCST003435	26833246	AIS	Any ischemic stroke	446696	https://www.megastroke.org/index.html	29531354
BFP	Body fat percentage	100716	ftp://ftp.ebi.ac.uk/pub/databases/gwas/summary_statistics/LuY_26833246_GCST003435	26833246	LAS	Large artery stroke	446696	https://www.megastroke.org/index.html	29531354
BFP	Body fat percentage	100716	ftp://ftp.ebi.ac.uk/pub/databases/gwas/summary_statistics/LuY_26833246_GCST003435	26833246	CES	Cardioembolic stroke	446696	https://www.megastroke.org/index.html	29531354
BFP	Body fat percentage	100716	ftp://ftp.ebi.ac.uk/pub/databases/gwas/summary_statistics/LuY_26833246_GCST003435	26833246	SVS	Small vessel stroke	446696	https://www.megastroke.org/index.html	29531354
BFP	Body fat percentage	100716	ftp://ftp.ebi.ac.uk/pub/databases/gwas/summary_statistics/LuY_26833246_GCST003435	26833246	T2D2	Type 2 diabetes	69033	http://diagram-consortium.org/downloads.html	22885922

## Sheet: Table S6. IL-6
Table S6. Genome wide association studies for IL-6 analysis.
	Tait Symbol	Trait	Sample Size	summary_statistics_link	PMID
Exposure	IL-6	plasma soluble IL6 receptor	3301	http://www.phpc.cam.ac.uk/ceu/proteins/	29875488
Outcome	HDL-C	High-density lipoprotein cholesterol	188577	http://csg.sph.umich.edu/abecasis/public/lipids2013/jointGwasMc_HDL.txt.gz	24097068
	LDL-C	Low-density lipoprotein cholesterol	188577	http://csg.sph.umich.edu/abecasis/public/lipids2013/jointGwasMc_LDL.txt.gz	24097068
	TG	Triglycerides	188577	http://csg.sph.umich.edu/abecasis/public/lipids2013/jointGwasMc_TG.txt.gz	24097068
	Asthma	Asthma	385822	https://atlas.ctglab.nl/ukb2_sumstats/6152_8_logistic.EUR.sumstats.MACfilt.txt.gz	31427789
	AS	Any stroke	446696	https://www.megastroke.org/index.html	29531354
	AIS	Any ischemic stroke	446696	https://www.megastroke.org/index.html	29531354
	CES	Cardioembolic stroke	446696	https://www.megastroke.org/index.html	29531354
	SVS	Small vessel stroke	446696	https://www.megastroke.org/index.html	29531354
	AF	Atrial Fibrillation	1030836	http://csg.sph.umich.edu/willer/public/afib2018/	30061737
	RA	Rheumatoid arthritis	58284	https://grasp.nhlbi.nih.gov/FullResults.aspx	24390342
	AD	Atopic dermatitis	116863	https://grasp.nhlbi.nih.gov/downloads/FullResults/2015/2015_Paternoster/EAGLE_AD_GWAS_results_2015.txt.gz	26482879
	BUN	Blood Urea Nitrogen	480698	https://ckdgen.imbi.uni-freiburg.de/	31152163
	eGFR	Estimated glomerular filtration rate	480698	https://ckdgen.imbi.uni-freiburg.de/	31152163
	CD	Crohn's disease	86640	https://www.ibdgenetics.org/downloads.html	26192919
	UC	Ulcerative colitis	86640	https://www.ibdgenetics.org/downloads.html	26192919
	BIP	Bipolar disorder	45871	https://www.med.unc.edu/pgc/download-results/?wpv-category=bipolar-disorder	31926635
	CAD	Coronary artery disease	547261	http://www.kp4cd.org/datasets/v2f	29212778
	T2D	Type 2 diabetes	231420	http://diagram-consortium.org/downloads.html	30297969
	MDD	Major depression	500199	http://pgcdata.med.unc.edu/major_depressive_disorders/PGC_UKB_depression_genome-wide.txt	30718901
	TC	Total cholesterol	188577	http://csg.sph.umich.edu/abecasis/public/lipids2013/jointGwasMc_TC.txt.gz	24097068
	BMD	bone mineral density estimated from quantitative heel ultrasounds	426824	http://www.gefos.org/?q=content/data-release-2018	30598549
	Liver	Other diseases of liver	452264	https://broad-ukb-sumstats-us-east-1.s3.amazonaws.com/round2/additive-tsvs/K76.gwas.imputed_v3.both_sexes.tsv.bgz
	SAA	serum amyloid A	3301	https://www.phpc.cam.ac.uk/ceu/proteins/	29875488
	T1D	Type 1 diabetes	17685	http://ftp.ebi.ac.uk/pub/databases/gwas/summary_statistics/GCST90000001-GCST90001000/GCST90000529	33830302
	COVID19Sev	Hospitalization of patients with COVID-19 by RT-qPCR, serological testing, or clinician diagnosis	908494	https://storage.googleapis.com/covid19-hg-public/20200915/results/20201020/eur/COVID19_HGI_B2_ALL_eur_leave_23andme_20201020.b37.txt.gz
	COVID19Sus	Testing positive for COVID-19 by reverse transcription quantitative polymerase chain reaction (RT-qPCR), serological testing, or clinician diagnosis by chart review or ICD coding	1299010	https://storage.googleapis.com/covid19-hg-public/20200915/results/20201020/eur/COVID19_HGI_C2_ALL_eur_leave_23andme_20201020.b37.txt.gz
	SCZ	Schizophrenia	105318	https://walters.psycm.cf.ac.uk/	29483656

## Sheet: Table S7. T2D (European)
Table S7. Genome wide association studies for T2D (European) analysis.
	Tait Symbol	Trait	Sample Size	summary_statistics_link	PMID
Exposure	HIP	Hip circumference	145437	http://portals.broadinstitute.org/collaboration/giant/images/e/e4/GIANT_2015_HIP_COMBINED_EUR.txt.gz	25673412
	WC	Waist circumference	153928	http://portals.broadinstitute.org/collaboration/giant/images/5/57/GIANT_2015_WC_COMBINED_EUR.txt.gz	25673412
	WHR	Waist-hip ratio	144584	http://portals.broadinstitute.org/collaboration/giant/images/5/54/GIANT_2015_WHR_COMBINED_EUR.txt.gz	25673412
	BMI	Body mass index	339224	http://portals.broadinstitute.org/collaboration/giant/images/1/15/SNP_gwas_mc_merge_nogc.tbl.uniq.gz	25673413
	BFP	Body fat percentage	100716	ftp://ftp.ebi.ac.uk/pub/databases/gwas/summary_statistics/LuY_26833246_GCST003435	26833246
	BL	Birth length	22245	http://egg-consortium.org/Birth_Length/EGG-GWAS-BL.txt.gz	25281659
	BW	Birth weight	139426	http://egg-consortium.org/BW3/BW3_EUR_summary_stats.txt.gz	27680694
	HR	Heart Rate	181171	https://grasp.nhlbi.nih.gov/downloads/ResultsOctober2016/den%20Hoed/HeartRateMETA_STAGE1_GWASHR_SUMSTATS.txt.zip	23583979
	HF	Heart Failure	977333	https://personal.broadinstitute.org/ryank/HERMES_Jan2019_HeartFailure_summary_data.txt.zip	31919418
	HDL-C	High-density lipoprotein cholesterol	188577	http://csg.sph.umich.edu/abecasis/public/lipids2013/jointGwasMc_HDL.txt.gz	24097068
	TG	Triglycerides	188577	http://csg.sph.umich.edu/abecasis/public/lipids2013/jointGwasMc_TG.txt.gz	24097068
	SBP	Systolic blood pressure	757601	https://grasp.nhlbi.nih.gov/downloads/ResultsAug2019/2018/Evangelou/UKB-ICBPmeta750k_SBPsummaryResults.txt.gz	30224653
	DBP	Diastolic blood pressure	757601	https://grasp.nhlbi.nih.gov/downloads/ResultsAug2019/2018/Evangelou/UKB-ICBPmeta750k_SBPsummaryResults.txt.gz	30224653
	PP	Pulse pressure	757601	https://grasp.nhlbi.nih.gov/downloads/ResultsAug2019/2018/Evangelou/UKB-ICBPmeta750k_SBPsummaryResults.txt.gz	30224653
	AIS	Any ischemic stroke	446696	https://www.megastroke.org/index.html	29531354
	MDD	Major depression	500199	http://pgcdata.med.unc.edu/major_depressive_disorders/PGC_UKB_depression_genome-wide.txt	30718901
	UA	serum urate	110347	http://metabolomics.helmholtz-muenchen.de/gugc/GUGC_MetaAnalysis_Results_UA.csv.zip	23263486
	RBC	Red blood cell count	444442	http://www.mhi-humangenetics.org/dataset/BCX2_RBC_EA_GWAMA.out.gz	32888493
	WBC	Total white blood cell count	426287	http://www.mhi-humangenetics.org/dataset/BCX2_WBC_EA_GWAMA.out.gz	32888493
	PLT	Platelet count	444298	http://www.mhi-humangenetics.org/dataset/BCX2_PLT_EA_GWAMA.out.gz	32888493
	Glu	Glutamate	7824	http://metabolomics.helmholtz-muenchen.de/gwas/index.php?task=download	24816252
	Gly	Glycine	7824	http://metabolomics.helmholtz-muenchen.de/gwas/index.php?task=download	24816252
	DHA	Docosahexaenoic acid	8866	http://faculty.washington.edu/rozenl/files/CHARGE_N3_DHA.txt	21829377
	OA	18:1n9	8961	http://faculty.washington.edu/rozenl/files/CHARGE_181n9.txt	23362303
	ISI	Insulin sensitivity index	16753	https://www.magicinvestigators.org/downloads/	27416945
	FG	Fasting glucose	58074	ftp://anonymous@web-ftp.ex.ac.uk/docs/downloads/MAGIC_Manning_et_al_FastingGlucose_MainEffect.txt.gz	20081858
	FI	Fasting insulin	51750	ftp://anonymous@web-ftp.ex.ac.uk/docs/downloads/MAGIC_Manning_et_al_lnFastingInsulin_MainEffect.txt.gz	20081858
	IR	HOMA-IR	46186	ftp://anonymous@web-ftp.ex.ac.uk/docs/downloads/MAGIC_ln_HOMA-IR.txt	20081858
	HbA1c	HbA1c	46368	ftp://anonymous@web-ftp.ex.ac.uk/docs/downloads/HbA1c_METAL_European.txt.gz	28898252
Outcome	T2D	Type 2 diabetes	231420	http://diagram-consortium.org/downloads.html	30297969

## Sheet: Table S8. T2D (Asian)
Table S8. Genome wide association studies for T2D (Asian) analysis.
	Tait Symbol	Trait	Sample Size	summary_statistics_link	PMID
Exposure	BMI	Body mass index	158284	http://jenger.riken.jp/en/result	28892062
	HF	Congestive heart failure	212453	http://jenger.riken.jp/en/result	32514122
	HDL-C	High-density-lipoprotein cholesterol	70657	http://jenger.riken.jp/en/result	29403010
	TG	Triglyceride	105597	http://jenger.riken.jp/en/result	29403010
	SBP	Systolic blood pressure	136597	http://jenger.riken.jp/en/result	29403010
	DBP	Diastolic blood pressure	136615	http://jenger.riken.jp/en/result	29403010
	PP	Pulse pressure	136249	http://jenger.riken.jp/en/result	29403010
	AIS	Ischemic stroke	209974	http://jenger.riken.jp/en/result	32514122
	RBC	Red blood cell count	138303	http://www.mhi-humangenetics.org/dataset/BCX2_RBC_EAS_GWAMA.out.gz	32888493
	WBC	Total white blood cell count	143401	http://www.mhi-humangenetics.org/dataset/BCX2_WBC_EAS_GWAMA.out.gz	32888493
	PLT	Platelet count	144456	http://www.mhi-humangenetics.org/dataset/BCX2_PLT_EAS_GWAMA.out.gz	32888493
	Glu	Glutamate	1954	https://blog.nus.edu.sg/agen/summary-statistics/sp2-metabolites/	31628463
	Gly	Glycine	1954	https://blog.nus.edu.sg/agen/summary-statistics/sp2-metabolites/	31628463
	HbA1c	HbA1c	12056	https://blog.nus.edu.sg/agen/summary-statistics/hba1c-chrx-2020/
Outcome	T2D	Type 2 diabetes	433540	https://blog.nus.edu.sg/agen/summary-statistics/t2d-2020/
